# Supplementary material for: Increasing Uptake of COVID-19 Vaccination and Reducing Health Inequalities in Patients on Renal Replacement Therapy—Experience from a Single Tertiary Centre
Source: MDPI journal article supplement (doi:10.3390/vaccines10060939), 2022-06-13
Supplement: s1 [file s1]

**Supplementary file S1**  
**COVID VACCINE reaction guide**

Dear Sir / Madam

Hospital number

Name

The trial data reported so far is reassuring that most patients tolerate the vaccination well. Pain at the injection site was the commonest reported side-effect. In patients who did report vaccine related local reactions, most were mild-to-moderate and resolved within 1-2 days. Patients did report increased local symptoms after the first vaccine dose. Nobody experienced a grade 4 local reaction. Most who experience side-effects find they resolve spontaneously within 2-3 days. Please grade your symptoms.

**Vaccine Dose 1-Local reactions**

|                        | Mild (Grade 1)                   | Moderate (grade2)        | Severe (Grade 3)        | Potentially life threatening (Grade 4)   | Most severe grade in first week<br>Grade 0=No symptoms |
|------------------------|----------------------------------|--------------------------|-------------------------|------------------------------------------|--------------------------------------------------------|
| Pain at injection site | Does not interfere with activity | Interferes with activity | Prevents daily activity | A&E visit or hospitalization due to pain |                                                        |
| Redness                | 2.5-5.0 cm                       | 5-10cm                   | >10cm                   | Skin blackening or exfoliation           |                                                        |
| Swelling               | 2.5-5.0 cm                       | 5-10cm                   | >10cm                   | Skin blackening                          |                                                        |

**Vaccine Dose 1-Systemic Reactions**

Fatigue and headache were reported in almost 50% of participants but severe systemic reactions occurred in less than 4%

|                             | Mild (Grade 1)                   | Moderate (grade2)               | Severe (Grade 3)                  | Potentially life threatening (Grade 4)                              | Most severe grade in 1st week<br>Grade 0=No symptoms |
|-----------------------------|----------------------------------|---------------------------------|-----------------------------------|---------------------------------------------------------------------|------------------------------------------------------|
| Vomiting                    | 1-2 times in 24 hours            | >2 times in 24 hours            | Requires IV hydration             | A&E visit or hospitalization for hypotensive shock                  |                                                      |
| Diarrhoea                   | 2-3 loose stool in 24 hours      | 4-5 loose stools in 24 hours    | 6 or more loose stool in 24 hours | A&E visit or hospitalization for severe diarrhoea                   |                                                      |
| Headache                    | Does not interfere with activity | Some interference with activity | Prevents daily routine activity   | A&E visit or hospitalization for severe headache                    |                                                      |
| Fatigue/tiredness           | Does not interfere with activity | Some interference with activity | Prevents daily routine activity   | A&E visit or hospitalization for severe fatigue                     |                                                      |
| Chills                      | Does not interfere with activity | Some interference with activity | Prevents daily routine activity   | A&E visit or hospitalization for severe chills                      |                                                      |
| New or worsened muscle pain | Does not interfere with activity | Some interference with activity | Prevents daily routine activity   | A&E visit or hospitalization for severe new or worsened muscle pain |                                                      |
| New or worsened joint pain  | Does not interfere with activity | Some interference with activity | Prevents daily routine activity   | A&E visit or hosp. for severe new or worsened joint pain            |                                                      |
